# Supplementary material for: One sample fits all: a microfluidic-assisted methodology for label-free isolation of CTCs with downstream methylation analysis of cfDNA in lung cancer
Source: Royal Society of Chemistry journal article supplement (doi:10.1039/d2bm00044j), 2022-01-01
Supplement: d2bm00044j1.pdf [file d2bm00044j1.pdf]

## Electronic Supplementary Information

for

### One sample fits all: a microfluidic-assisted methodology for label-free isolation of CTCs with downstream methylation analysis of cfDNA in lung cancer

Ângela Carvalho<sup>a,b,c,\*</sup>, Catarina Guimarães-Teixeira<sup>c,d</sup>, Vera Constâncio<sup>c,d</sup>, Mariana Fernandes<sup>a,b</sup>,  
Catarina Macedo-Silva<sup>c,d</sup>, Rui Henrique<sup>c,d,e,f</sup>, Fernando Jorge Monteiro<sup>a,b,c,g</sup>, Carmen Jerónimo<sup>c,d,f</sup>

#### Affiliations

- <sup>a</sup> *i3S-Instituto de Investigação e Inovação em Saúde, Universidade do Porto, Rua Alfredo Allen 208, 4200-135 Porto, Portugal*
- <sup>b</sup> *INEB-Instituto de Engenharia Biomédica, Universidade do Porto, Rua Alfredo Allen 208, 4200-135 Porto, Portugal*
- <sup>c</sup> *Porto Comprehensive Cancer Centre (P.CCC), R. Dr. António Bernardino de Almeida, 4200-072 Porto, Portugal*
- <sup>d</sup> *Cancer Biology and Epigenetics Group, IPO Porto Research Center (GEBC CI-IPOP), Portuguese Oncology Institute of Porto (IPO Porto), R. Dr. António Bernardino de Almeida, 4200-072 Porto, Portugal*
- <sup>e</sup> *Department of Pathology, Portuguese Oncology Institute of Porto (IPO Porto), R. Dr. António Bernardino de Almeida, 4200-072 Porto, Portugal*
- <sup>f</sup> *Department of Pathology and Molecular Immunology, School of Medicine and Biomedical Sciences, University of Porto (ICBAS-UP), Rua Jorge Viterbo Ferreira 228, 4050-513 Porto, Portugal*
- <sup>g</sup> *Faculdade de Engenharia, Departamento de Engenharia Metalúrgica e Materiais, Universidade do Porto, Rua Dr Roberto Frias, s/n, 4200-465 Porto, Portugal*

#### Corresponding author

\* Ângela Carvalho (angela.carvalho@ineb.up.pt)

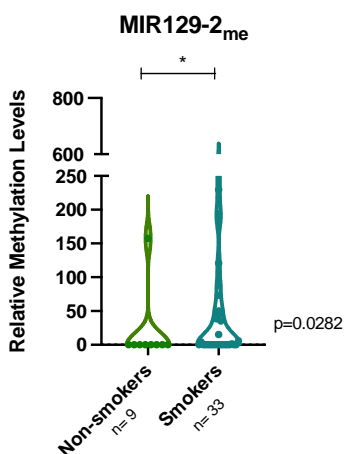

**Figure S1** - Distribution of MIR129-2me relative methylation levels according with smoking habits. Mann Whitney U Test, n.s.  $p > 0.05$ , \* $p < 0.05$ , \*\* $p < 0.01$ , \*\*\* $p < 0.001$ , \*\*\*\* $p < 0.0001$ .
